# Supplementary material
Source: PubMed Central journal article supplement (PMC4025836)
Supplement: ml300146q_si_001.pdf [file ml300146q_si_001.pdf]

# Supporting Information

## Discovery of Phenylamino-pyridine Derivatives as Novel HIV-1 Non-Nucleoside Reverse Transcriptase Inhibitors

Junwon Kim,<sup>a</sup> Doohyun Lee,<sup>a</sup> Changmin Park,<sup>a</sup> Wonyoung So,<sup>a</sup> Mina Jo,<sup>a</sup> Taedong Ok,<sup>a</sup> Jeongjin Kwon,<sup>a</sup> Sunju Kong,<sup>c</sup> Suyeon Jo,<sup>a</sup> Youngmi Kim,<sup>b</sup> Jihyun Choi,<sup>a</sup> Hyoung Cheul Kim,<sup>a</sup> Yoonae Ko,<sup>b</sup> Inhee Choi,<sup>b</sup> Youngsam Park,<sup>d</sup> Jaewan Yoon,<sup>d</sup> Moon Kyeong Ju,<sup>d</sup> Junghwan Kim,<sup>d</sup> Sung-Jun Han,<sup>d</sup> Tae-Hee Kim,<sup>e,j</sup> Jonathan Cechetto,<sup>e</sup> Jiyoung Nam,<sup>f</sup> Peter Sommer,<sup>g</sup> Michel Liuzzi,<sup>h</sup> Jinhwa Lee,<sup>i</sup> Zaesung No<sup>\*,i</sup>

<sup>a</sup> Medicinal Chemistry 2, <sup>b</sup> Medicinal Chemistry 1, <sup>c</sup> Medicinal Chemistry 3, <sup>d</sup> Drug Biology Group, <sup>e</sup> Screening Technology Platforms Group, <sup>f</sup> DMPK Group, <sup>g</sup> Cell Biology of Retroviruses Group, <sup>h</sup> Early Discovery Program, <sup>i</sup> Late Discovery Program, Institut Pasteur Korea (IP-K), Sampyeong-dong 696, Bundang-gu, Seongnam-si, Gyeonggi-do 463-400, Republic of Korea  
<sup>j</sup> Department of Biotechnology, College of Life Science and Biotechnology, Yonsei University, 50 Yonsei-ro, Seodaemun-gu, Seoul 120-749, Republic of Korea

\* Corresponding author. Tel.: +82-31-8018-8160 fax: +82-31-8018-8015; e-mail: noxide@ip-korea.org

### Contents

Biological assays S2

Experimental procedures S3

## Biological Assays

### HIV full replication assay.

CEMx174-LTR-GFP cells (clone CG8) were seeded with a microplate dispenser (WellMate; Thermo Scientific Matrix; U.S.A.) at a density of 4,000 cells/well into 384-well glass plates (Evotec, Hamburg, Germany) pre-dispensed with 10  $\mu$ L of compound diluted in DMSO and incubated for 1 h at 37 °C, 5% CO<sub>2</sub>. Then cells were infected with HIV-1<sub>LAI</sub> at a multiplicity of infection (MOI) of 3 and incubated for 5 days at 37 °C, 5% CO<sub>2</sub>. Fluorescence intensities were determined using a multilabel plate reader (Victor3; PerkinElmer, Inc.; U.S.A.). And see Sommer, P.; Vartanian, J. P.; Wachsmuth, M.; Henry, M.; Guetard, D.; Wain-Hobson, S. *J. Mol. Biol.* **2004**, *344*, 11.

### HIV-1 RT activity assay

The p66 and p51, two subunits of HIV RT, were amplified by PCR with N-terminal 6 $\times$ His tag using the HIV-1 derived pol protein gene (Gene bank accession number, AY181196.1) as a template and subcloned into pET-28a and pET-15b (Novagen), respectively. The ClaI/ApaI fragment of pET-15b-p51 was ligated to SphI/ApaI digested pET-28a-p66. As a result, fusion plasmid bearing two subunits with their own 6 $\times$ His tag and T7 promoter was generated. The plasmid was transformed into E. coli strain, Rosetta DE3 pLysS, and protein expression was induced by 0.1 mM IPTG for 15 h at 25 °C. Overexpressed heterodimeric protein was purified by AKTA purification system (GE healthcare).

Enzyme activity assay was performed based on the scintillation proximity assay (SPA) technique. According to the kinetic analysis, K<sub>m</sub> value of HIV-RT against dTTP was 4.39  $\mu$ M. Each reaction consists of 2 ng enzyme, 4  $\mu$ M dTTP, 0.4  $\mu$ Ci tritium labeled dTTP, 40  $\mu$ g SPA bead (GE healthcare), and 0.4  $\mu$ L poly(A)-oligo(dT) (9A/mL) in a total volume of 40  $\mu$ L with buffer (55mM Tris-Cl, pH 7.8, 30 mM KCl, 30 mM MgCl<sub>2</sub>, 1 mM DTT, 0.01% Triton X-100, 50 mM EGTA, 0.1mg/ml BSA). The final DMSO concentration was maintained at 1%. After pre-incubation of enzyme and compound for 30 min at 24 °C, reaction mixture was added and incubated for 60 min at 37 °C. Reaction was terminated by addition of 80  $\mu$ L of 0.12 M EDTA. The signal was counted using MicroBeta2 detector (Perkin Elmer).

## Experimental Procedures

### General Information

All reactions were carried out under an argon atmosphere in flame-dried glassware with magnetic stirring. THF, CH<sub>2</sub>Cl<sub>2</sub>, Et<sub>2</sub>O, and CH<sub>3</sub>CN were purified by passage through a bed of activated alumina.<sup>1</sup> Reagents were purified prior to use unless otherwise stated following the guidelines of Perrin and Armarego.<sup>2</sup> Purification of reaction products was carried out by flash chromatography using silica gel 60 (Merck, 230-400 mesh). Analytical thin layer chromatography was performed on 0.25 mm silica gel 60-F<sub>254</sub> plates (Merck). Visualization was accomplished with UV light and iodine or potassium permanganate stain followed by heating. Infrared spectra were recorded on a Varian 3100 FT-IR spectrometer. <sup>1</sup>H-NMR spectra were recorded on a Varian 400 MHz spectrometer and are reported in ppm using solvent as an internal standard (CDCl<sub>3</sub> at 7.26 ppm). Data are reported as (ap = apparent, s = singlet, d = doublet, t = triplet, q = quartet, m = multiplet, b = broad; coupling constant(s) in Hz; integration). Proton-decoupled <sup>13</sup>C-NMR spectra were recorded on a Varian 100 MHz spectrometer and are reported in ppm using solvent as an internal standard (CDCl<sub>3</sub> at 77.0 ppm or DMSO-*d*<sub>6</sub> at 2.50 ppm). LC/MS data were obtained using a Waters 2695 LC and Micromass ZQ spectrometer. The purity of all biologically tested compounds was ≥ 95 % by HPLC. Yields refer to purified products and are not optimized.

---

<sup>1</sup> Pangborn, A. B.; Giardello, M. A.; Grubbs, R. H.; Rosen, R. K.; Timmers, F. J. *Organometal.* **1996**, *15*, 1518-1520.

<sup>2</sup> Perrin, D. D. and Armarego, W. L. *Purification of Laboratory Chemicals*; 3rd Ed., Pergamon Press, Oxford. 1988.

## General Procedures for the Synthesis of Substituted Phenylaminopyridine (PAP) derivatives 7–27<sup>a</sup>

The target phenylaminopyridine (PAP) compounds (Tables 1 and 2) were synthesized according to the general routes. The left hand side (LHS) subunits **1e** were prepared mainly from two methods: (i) triazine ring formation from readily available  $\alpha,\alpha$ -dibromo acetophenone derivatives **1b** via nucleophilic displacement with excess morpholine and then condensation with aminoguanidine in MeOH in the presence of AcOH<sup>3</sup> or (ii) direct Suzuki coupling reaction between boronic acid **1c** and heteroaryl halide/triflate **1d**.<sup>4</sup> For the synthesis of the right hand side (RHS) subunits (**1h**, **1k**, and **1n**), either radical bromination of substituted pyrazole **1g** /pyrazolopyridine **1m** with NBS in the presence of AIBN to give halogenated methyl pyrazole/pyrazolopyridine or deprotonation with *n*-BuLi with THP-protected pyrazole **1j** followed by treatment with DMF to generate formylated pyrazole **1k** was utilized.<sup>5</sup> The final coupling of two subunits was achieved in a straightforward fashion by *N*-alkylation or reductive amination methods. Subsequent deprotection of Boc/THP groups under acidic condition afforded targeted PAP derivatives (**7–27**).

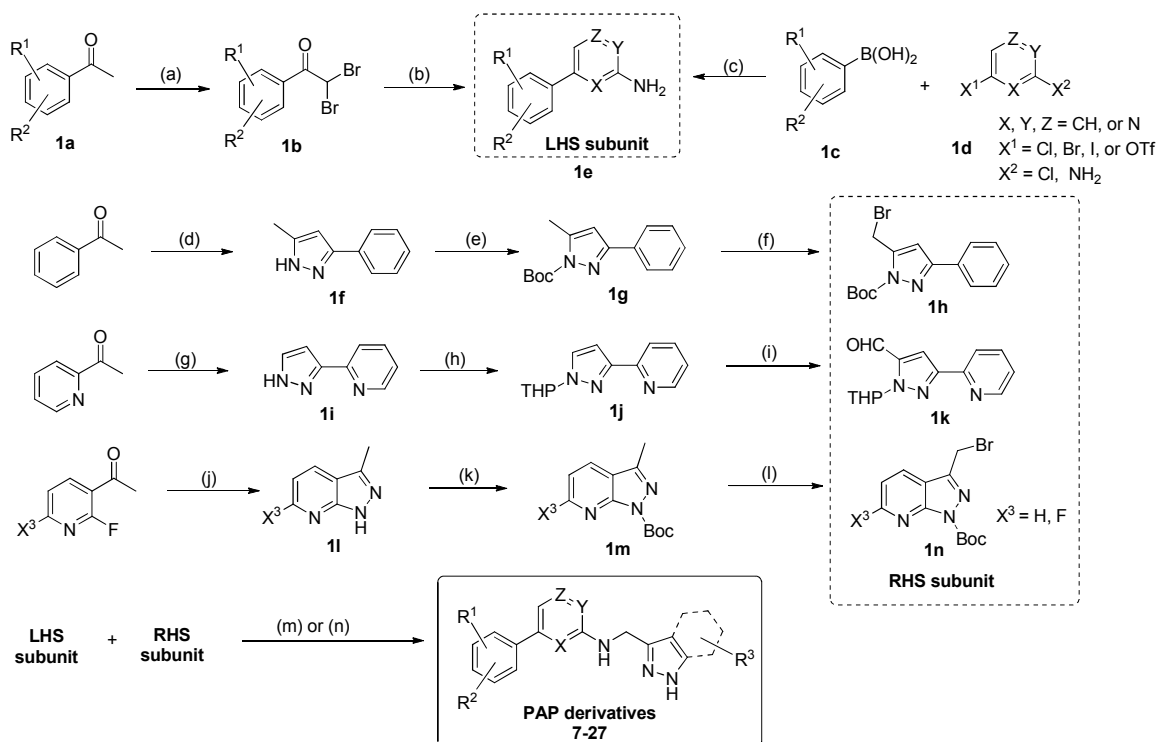

<sup>a</sup> Reagent and conditions: (a) phenyltrimethylammonium tribromide (PTT), THF, 25 °C, overnight; (b) (i) morpholine, THF, 25 to 65 °C, 24 h; (ii) aminoguanidine bicarbonate (AGB), AcOH, MeOH, reflux, 24 h; (c) Pd(PPh<sub>3</sub>)<sub>4</sub>, sat. K<sub>2</sub>CO<sub>3</sub>, toluene/EtOH, 120 °C, overnight; (d) (i) LiHMDS, toluene, acid chloride, 0 °C, 1 min, then AcOH; (ii) NH<sub>2</sub>NH<sub>2</sub>·H<sub>2</sub>O, THF/EtOH, reflux, 1 h; (e) Boc<sub>2</sub>O, Et<sub>3</sub>N, DMAP, CH<sub>3</sub>CN, 25 °C, 1 h; (f) NBS, AIBN, ClCH<sub>2</sub>CH<sub>2</sub>Cl, 90 °C, 2 h; (g) (i) *n*-BuLi, THF, -78 °C, 1 h, then DMF; (ii) *n*-BuLi, THF, -78 °C, 1 h, then DMF.

<sup>3</sup> Limanto, J.; Desmond, R. A.; Gauthier, D. R.; Devine, P. N.; Reamer, R. A.; Volante, R. P. A regioselective approach to 5-substituted-3-amino-1,2,4-triazines. *Org. Lett.* **2003**, 5, 2271-2274.

<sup>4</sup> Kotha, S.; Lahiri, K.; Kashinath, D. Recent applications of the Suzuki-Miyaura cross-coupling reaction in organic synthesis. *Tetrahedron* **2002**, 58, 9633-9695.

<sup>5</sup> McLaughlin, M.; Marcantonio, K.; Chen, C.-y.; Davies, I. W. A Simple, Modular Method for the Synthesis of 3,4,5-Trisubstituted Pyrazoles *J. Org. Chem.* **2008**, 73, 4309-4312.

(i) DMFDMA, toluene, 100 °C, 48 h; (ii)  $\text{NH}_2\text{NH}_2 \cdot \text{H}_2\text{O}$ , EtOH, reflux, overnight; (h) DHP, TFA, toluene/ $\text{CH}_3\text{CN}$ , 80 °C, 24 h; (i)  $n\text{-BuLi}$ , THF, 0 °C, 10 min, then DMF; (j)  $\text{NH}_2\text{NH}_2 \cdot \text{H}_2\text{O}$ , ethylene glycol, 165 °C; (k)  $\text{Boc}_2\text{O}$ ,  $\text{Et}_3\text{N}$ , DMAP,  $\text{CH}_3\text{CN}$ , 25 °C, 1 h; (l) NBS, AIBN,  $\text{ClCH}_2\text{CH}_2\text{Cl}$ , 90 °C, 2 h; (m) (i) **1e**,  $\text{LiHMDS}$ , THF, 0 °C, 1 h, then RHS subunit; (ii) 4N HCl (2 eq.), dioxane, 25 °C, 1 h; (n) (i) **1e**, **1k**, AcOH, THF, molecular sieve, 25 °C, 5 h; (ii)  $\text{NaBH}(\text{OAc})_3$ , 25 °C, overnight; (iii) HCl, MeOH, 25 °C, 3 h.

### Synthesis of compound 27

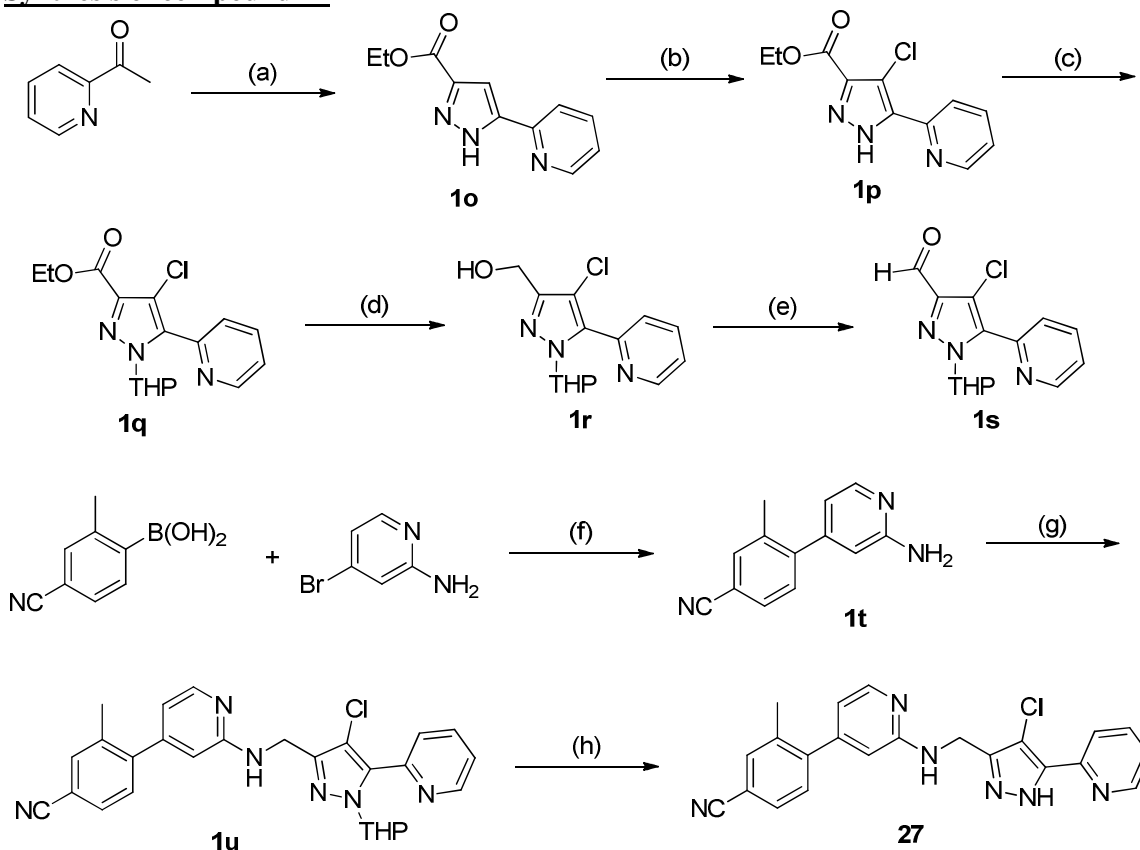

Reagents and conditions: (a) (i)  $\text{NaOEt}$ , EtOH, diethyl oxalate, 25 °C, 20 h; (ii)  $\text{H}_2\text{NNH}_2$ ,  $\text{H}_2\text{O}/\text{EtOH}$ , reflux, 2 h, 69% over 2 steps; (b) NCS,  $\text{CCl}_4$ , DMF, 55 °C, 15 h, 86%; (c) DHP, TFA,  $\text{CH}_3\text{CN}/\text{toluene}$ , 100 °C, 6 h, 42%; (d) LAH, THF, 0 °C, 30 min, 58%; (e) Dess-Martin Periodinane,  $\text{CH}_2\text{Cl}_2$ , 25 °C, 3 h, 91%; (f)  $\text{Pd}(\text{dppf})\text{Cl}_2$ ,  $\text{Na}_2\text{CO}_3$ , DME/ $\text{H}_2\text{O}$ , 140 °C, 2 h, 70%; (g)  $\text{NaBH}(\text{OAc})_3$ , AcOH, 1,2-dichloroethane, 25 °C, 24 h, 50%; (h) HCl, MeOH, 40 °C, 15 h, 82%.

### Ethyl 5-(pyridin-2-yl)-1H-pyrazole-3-carboxylate (**1o**).

To a solution of diethyl oxalate (14.0 mL, 100 mmol) in EtOH (100 mL) at 25 °C was added a solution of  $\text{NaOEt}$  (41 mL, 21 wt. % in EtOH, 110 mmol), followed by a solution of 2-acetylpyridine (11.5 mL, 100 mmol) in EtOH (20 mL). The resulting mixture was stirred overnight at 25 °C. The reaction mixture was quenched by the addition of 2.4 N HCl (40 mL) and extracted with EtOAc ( $2 \times 40$  mL). The combined organic layers were washed successively with water and brine and dried over  $\text{MgSO}_4$ . After filtration and concentration *in vacuo*, ethyl 2,4-dioxo-4-(pyridin-2-yl)butanoate (20 g, 90%) was isolated as a brown solid and used in the following step without further purification.

To a solution of ethyl 2,4-dioxo-4-(pyridin-2-yl)butanoate (20 g, 90.4 mmol) in EtOH (150 mL) was added hydrazine monohydrate (4.4 mL, 90.4 mmol), and the reaction mixture was refluxed for 3 h. The reaction mixture was allowed to cool to room temperature and the solvent was evaporated under reduced pressure. The residue was diluted with Et<sub>2</sub>O and washed successively with water and brine. The organic layer was dried over MgSO<sub>4</sub>, filtered and concentrated *in vacuo* to give ethyl 5-(pyridin-2-yl)-1*H*-pyrazole-3-carboxylate **1o** (15.0 g, 69%) as a pale yellow solid, which is used in the next step without further purification: <sup>1</sup>H NMR (400 MHz, CDCl<sub>3</sub>) δ 12.23 (bs, 1H), 8.64 (d, *J* = 4.4 Hz, 1H), 7.34 (m, 2H), 7.57 (m, 2H), 4.43 (q, *J* = 7.2 Hz, 2H), 1.42 (t, *J* = 7.2 Hz, 3H); <sup>13</sup>C NMR (100 MHz, CDCl<sub>3</sub>) δ 161.8, 149.4, 148.1, 137.4, 123.3, 120.5, 106.4, 61.1, 14.2; LRMS (electrospray) *m/z* calculated for C<sub>11</sub>H<sub>11</sub>N<sub>3</sub>NaO<sub>2</sub> [M+Na]<sup>+</sup> 240.07, found 239.87.

#### **Ethyl 4-chloro-5-(pyridin-2-yl)-1*H*-pyrazole-3-carboxylate (1p)**

A solution of ethyl 5-(pyridin-2-yl)-1*H*-pyrazole-3-carboxylate **1o** (4.00 g, 18.4 mmol), *N*-chlorosuccinimide (3.69 g, 27.6 mmol) in CH<sub>3</sub>CN/DMF (25 mL/5 mL) was heated to 55 °C for 15 h. The reaction mixture was concentrated under reduced pressure, and then the residue was diluted with CH<sub>2</sub>Cl<sub>2</sub>. The organic layer was dried over MgSO<sub>4</sub>, filtered and concentrated *in vacuo* to give ethyl 4-chloro-5-(pyridin-2-yl)-1*H*-pyrazole-3-carboxylate **1p** (4.00 g, 86%) as a light brown solid, which is used in the next step without further purification: <sup>1</sup>H NMR (400 MHz, CDCl<sub>3</sub>) δ 12.35 (bs, 1H), 8.65 (m, 1H), 8.26 (d, *J* = 8.0 Hz, 1H), 7.86 (dt, *J* = 8.0, 1.7 Hz, 1H), 7.36-7.33 (m, 1H), 4.46 (t, *J* = 7.2 Hz, 2H), 1.43 (t, *J* = 7.2 Hz, 3H), 1.33 (t, *J* = 7.0 Hz, 3H); <sup>13</sup>C NMR (100 MHz, CDCl<sub>3</sub>) δ 161.1, 149.5, 146.3, 137.9, 124.2, 121.5, 111.2, 61.5, 14.4; LRMS (electrospray) *m/z* calculated for C<sub>11</sub>H<sub>11</sub>ClN<sub>3</sub>O<sub>2</sub> [M+H]<sup>+</sup> 252.05, found 251.83.

#### **Ethyl 4-chloro-5-(pyridin-2-yl)-1-(tetrahydro-2*H*-pyran-2-yl)-1*H*-pyrazole-3-carboxylate (1q).**

To a solution of ethyl 4-chloro-5-(pyridin-2-yl)-1*H*-pyrazole-3-carboxylate **1p** (4.00 g, 15.9 mmol) in CH<sub>3</sub>CN/toluene (1:1, 40 mL) was added 3,4-dihydro-2*H*-pyran (13.6 mL, 149 mmol) and TFA (0.5 mL, 6.53 mmol). The reaction mixture was heated to 100 °C for 8 h. After cooling to 25 °C, the reaction mixture was concentrated under reduced pressure, and then the residue was purified by flash column chromatography to give the desired carboxylate **1q** (2.62 g, 42%) as a light yellow oil: <sup>1</sup>H NMR (400 MHz, CDCl<sub>3</sub>) δ 8.75 (d, *J* = 4.8 Hz, 1H), 7.85 (dt, *J* = 7.8, 1.6 Hz, 1H), 7.74 (d, *J* = 8.0 Hz, 1H), 7.35 (dd, *J* = 7.6, 4.8 Hz, 1H), 5.95 (dd, *J* = 9.6, 2.4 Hz, 1H), 4.45 (q, *J* = 7.2 Hz, 2H), 3.95-3.88 (m, 1H), 3.43 (dt, *J* = 11.2, 2.8 Hz, 1H), 2.44-2.56 (m, 1H), 2.11-1.88 (m, 1H), 1.70-1.44 (m, 3H), 1.42 (t, *J* = 7.2 Hz, 3H); <sup>13</sup>C NMR (100 MHz, CDCl<sub>3</sub>) δ 161.2, 149.3, 147.0, 140.1, 139.1, 136.8, 125.7, 123.8, 112.6, 85.9, 67.8, 61.3, 28.9, 24.8, 22.4, 14.6; LRMS (electrospray) *m/z* calculated for C<sub>16</sub>H<sub>18</sub>ClN<sub>3</sub>NaO<sub>3</sub> [M+Na]<sup>+</sup> 358.09, found 357.85.

#### **(4-Chloro-5-(pyridin-2-yl)-1-(tetrahydro-2*H*-pyran-2-yl)-1*H*-pyrazol-3-yl)methanol (1r).**

To a 0 °C solution of ester **1q** (2.18 g, 6.50 mmol) in THF (40 mL) was added LiAlH<sub>4</sub> (7.8 mL, 1.0 M in THF, 7.80 mmol). The resultant mixture was stirred at 0 °C for 1 h. The reaction was quenched by the slow addition of sat. NH<sub>4</sub>Cl. The aqueous layer was extracted with EtOAc, dried over MgSO<sub>4</sub>. After filtration and concentration *in vacuo*, the residue was purified by flash column chromatography to give alcohol **1r** (1.11 g, 58%) as a white waxy solid: <sup>1</sup>H NMR (400 MHz, CDCl<sub>3</sub>) δ 8.75 (d, *J* = 4.8, 1H), 7.85 (dt, *J* = 7.8, 1.6 Hz, 1H), 7.74 (d, *J* = 8.0 Hz, 1H), 7.35 (dd, *J* = 7.6, 4.8 Hz, 1H), 5.86 (dd, *J* = 10.6, 2.4 Hz, 1H), 4.77 (d, *J* = 6.4 Hz, 2H), 3.99 (d, *J* = 11.6 Hz, 1H), 3.48 (dt, *J* = 11.4, 2.4 Hz, 1H), 2.52-2.40 (m, 1H), 2.33 (t, *J* = 6.4 Hz, 1H), 2.14-1.96 (m, 2H), 1.74-1.62 (m, 2H), 1.56-1.48 (m, 1H); <sup>13</sup>C NMR (100 MHz, CDCl<sub>3</sub>) δ 149.9, 148.5, 147.5, 138.8, 136.8, 125.4, 123.5, 109.0, 85.4, 68.1, 57.1, 29.5, 24.9, 22.8; LRMS (electrospray) *m/z* calculated for C<sub>14</sub>H<sub>16</sub>ClN<sub>3</sub>NaO<sub>2</sub> [M+Na]<sup>+</sup> 316.08, found 315.87.

**4-Chloro-5-(pyridin-2-yl)-1-(tetrahydro-2H-pyran-2-yl)-1H-pyrazole-3-carbaldehyde (1s).**

To a solution of alcohol **1r** (1.11 g, 3.70 mmol) in CH<sub>2</sub>Cl<sub>2</sub> (13 mL) was added Dess-Martin periodinane (2.04 g, 4.81 mmol). The reaction was stirred vigorously for 3 h at room temperature. The reaction mixture was diluted with Et<sub>2</sub>O and filtered through a pad of celite. After concentration *in vacuo*, the residue was purified *via* flash column chromatography to give the desired aldehyde **1s** (1.01 g, 91%) as a waxy solid: <sup>1</sup>H NMR (400 MHz, CDCl<sub>3</sub>) δ 8.78-8.76 (m, 1H), 7.88 (dt, *J* = 7.7, 1.9, Hz, 1H), 7.78-7.74 (m, 1H), 7.40 (ddd, *J* = 7.6, 5.2, 1.2 Hz, 1H), 6.04 (dd, *J* = 9.4, 2.6 Hz, 1H), 3.88-3.80 (m, 1H), 3.50-3.44 (m, 1H), 2.52-2.40 (m, 1H), 2.17-2.05 (m, 2H), 1.78-1.52 (m, 3H); <sup>13</sup>C NMR (100 MHz, CDCl<sub>3</sub>) δ 185.3, 149.9, 146.3, 145.0, 140.3, 136.9, 125.8, 124.0, 110.9, 85.9, 67.9, 29.1, 24.7, 22.2; LRMS (electrospray) *m/z* calculated for C<sub>14</sub>H<sub>14</sub>ClN<sub>3</sub>NaO<sub>2</sub> [M+Na]<sup>+</sup> 314.07, found 313.82.

**4-(2-Aminopyridin-4-yl)-3-methylbenzonitrile (1t)**

To a solution of (4-cyano-2-methylphenyl)boronic acid (3.43 g, 20.2 mmol), 4-bromopyridin-2-amine (3.00 g, 16.8 mmol) in 1,2-dimethoxy ethane/water was added [1,1'-bis(diphenylphosphino)ferrocene]dichloropalladium (II) (366 mg, 0.50 mmol) and sodium carbonate (3.56 g, 33.6 mmol). The mixture was degassed by gently bubbling nitrogen and then heated at 140 °C for 2 h. The mixture was cooled to 25 °C and the insoluble material was removed by filtration through a pad of celite. The filtrate was concentrated *in vacuo* to remove solvents and then the residue was treated with excess ice-water. The precipitate was filtered and rinsed with water. After drying *in vacuo*, the crude product was washed with EtOAc and dried to give aminopyridine **1t** (2.46 g, 70%) as a gray solid, which did not require further purification: <sup>1</sup>H NMR (400 MHz, DMSO-*d*<sub>6</sub>) δ 7.97 (d, *J* = 5.2 Hz, 1H), 7.77 (s, 1H), 7.70 (d, *J* = 8.0 Hz, 1H), 7.35 (d, *J* = 7.6 Hz, 1H), 6.44 (d, *J* = 5.2 Hz, 1H), 6.38 (s, 1H), 6.07 (s, 2H), 2.25 (s, 3H); <sup>13</sup>C NMR (100 MHz, DMSO-*d*<sub>6</sub>) δ 159.9, 148.1, 147.9, 144.6, 136.4, 133.8, 129.74, 129.71, 118.6, 111.9, 110.6, 107.3, 19.5; LRMS (electrospray) *m/z* calculated for C<sub>13</sub>H<sub>12</sub>N<sub>3</sub> [M+H]<sup>+</sup> 210.10, found 209.86.

**4-(2-((4-Chloro-5-(pyridin-2-yl)-1-(tetrahydro-2H-pyran-2-yl)-1H-pyrazol-3-yl)methylamino)pyridin-4-yl)-3-methylbenzonitrile (1u).**

To a solution of 4-chloro-5-(pyridin-2-yl)-1-(tetrahydro-2H-pyran-2-yl)-1H-pyrazole-3-carbaldehyde **1s** (209 mg, 0.717 mmol) in 1,2-dichloroethane (10 mL)/AcOH (5 drops) was added 4-(2-aminopyridin-4-yl)-3-methylbenzonitrile **1t** (100 mg, 0.478 mmol) at 25 °C. The solution was stirred for 1 h and NaBH(OAc)<sub>3</sub> (213 mg, 0.956 mmol) was added. After stirring for 16 h at 25 °C, the reaction was carefully quenched with H<sub>2</sub>O and extracted with CH<sub>2</sub>Cl<sub>2</sub> (3×). The combined organic layers were dried over MgSO<sub>4</sub>, filtered, and concentrated *in vacuo*. The residue was purified by flash column chromatography to give coupled product **1u** (116 mg, 50%) as a waxy solid: <sup>1</sup>H NMR (400 MHz, CDCl<sub>3</sub>) δ 8.73 (d, *J* = 4.4 Hz, 1H), 8.16 (d, *J* = 5.2 Hz, 1H), 7.82 (t, *J* = 7.8 Hz, 1H), 7.71 (d, *J* = 7.6 Hz, 1H), 7.53 (s, 1H), 7.50 (d, *J* = 7.6 Hz, 1H), 7.34-7.31 (m, 1H), 7.28 (d, *J* = 7.6 Hz, 1H), 6.49 (d, *J* = 5.2 Hz, 1H), 6.47 (s, 1H), 5.84 (dd, *J* = 9.8, 2.2 Hz, 1H), 5.34 (bs, 1H), 4.10 (d, *J* = 6.8 Hz, 2H), 3.95 (d, *J* = 12.0 Hz, 1H), 3.45 (t, *J* = 11.2 Hz, 1H), 2.48-2.38 (m, 1H), 2.28 (s, 3H), 2.06-1.89 (m, 2H), 1.70-1.54 (m, 2H), 1.54-1.45 (m, 1H); <sup>13</sup>C NMR (100 MHz, CDCl<sub>3</sub>) δ 158.6, 149.9, 149.2, 148.3, 147.4, 146.1, 145.0, 138.9, 136.87, 136.84, 133.9, 129.9, 129.6, 125.3, 123.5, 118.9, 113.4, 111.7, 109.0, 107.2, 85.2, 68.0, 38.5, 29.4, 24.9, 22.8, 20.2; LRMS (electrospray) *m/z* calculated for C<sub>27</sub>H<sub>26</sub>ClN<sub>6</sub>O [M+H]<sup>+</sup> 485.19, found 484.94.

**4-(2-((4-Chloro-5-(pyridin-2-yl)-1H-pyrazol-3-yl)methylamino)pyridin-4-yl)-3-methylbenzonitrile (27)**

To a flask containing 4-(2-((4-chloro-5-(pyridin-2-yl)-1-(tetrahydro-2H-pyran-2-yl)-1H-pyrazol-3-yl)methylamino)pyridin-4-yl)-3-methylbenzonitrile **1u** (100 mg, 0.206 mmol) was added a solution of HCl (1.28 N in MeOH, 5 mL, 6.4 mmol, prepared by reaction between AcCl and

MeOH) at 25 °C. The resulting solution was heated at 40 °C for 2 h. After cooling to room temperature, the mixture was concentrated under reduced pressure and cautiously basified with sat. NaHCO<sub>3</sub>. The mixture was extracted with CH<sub>2</sub>Cl<sub>2</sub>. The organic layer was dried over MgSO<sub>4</sub>, filtered and concentrated *in vacuo*. The residue was purified by flash column chromatography to give the desired compound **27** (68 mg, 82%) as a white solid: <sup>1</sup>H NMR (400 MHz, CDCl<sub>3</sub>) δ 13.30 (bs, 1H), 8.68 (d, *J* = 4.4 Hz, 1H), 8.09 (d, *J* = 5.6 Hz, 1H), 7.95 (m, 2H), 7.81 (s, 1H), 7.73 (d, *J* = 8.0 Hz, 1H), 7.41 (m, 1H), 7.37 (d, *J* = 8.0 Hz, 1H), 7.03 (m, 1H), 6.54 (m, 2H), 4.53 (d, *J* = 5.2 Hz, 2H), 2.26 (s, 3H); <sup>13</sup>C NMR (100 MHz, THF-*d*<sub>8</sub>) δ 158.4, 151.3, 150.4, 149.3, 146.6, 146.0, 145.3, 140.0, 137.8, 137.7, 134.8, 130.9, 130.5, 123.9, 121.4, 119.1, 113.5, 113.2, 109.4, 107.3, 38.0, 20.3; LRMS (electrospray) *m/z* calculated for C<sub>22</sub>H<sub>18</sub>ClN<sub>6</sub> [M+H]<sup>+</sup> 401.13, found 401.43.

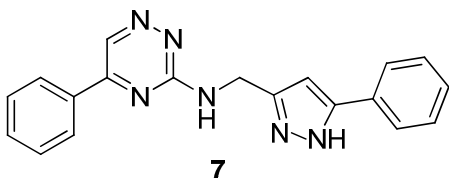

**5-Phenyl-*N*-((5-phenyl-1*H*-pyrazol-3-yl)methyl)-1,2,4-triazin-3-amine (7)**

<sup>1</sup>H NMR (400 MHz, DMSO-*d*<sub>6</sub>) δ 9.28 (d, *J* = 12 Hz, 1H), 8.21 (d, *J* = 6.8 Hz, 2H), 7.66 (d, *J* = 6.8 Hz, 2H), 7.56-7.55 (m, 3H), 7.36-7.25 (m, 3H), 6.59 (s, 1H), 4.66 (d, *J* = 21.6 Hz, 2H); TLC *R*<sub>f</sub> (*n*-Hexanes:EtOAc 1:1) = 0.42.

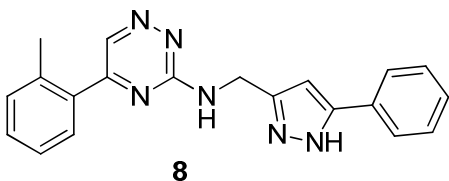

***N*-((5-Phenyl-1*H*-pyrazol-3-yl)methyl)-5-*o*-tolyl-1,2,4-triazin-3-amine (8)**

<sup>1</sup>H NMR (400 MHz, DMSO-*d*<sub>6</sub>) δ 13.03 (s, 0.5H), 12.76 (s, 0.5H), 8.83 (d, *J* = 10.4 Hz, 1H), 8.24 (bs, 1H), 7.69 (d, *J* = 16.8 Hz, 2H), 7.51 (d, *J* = 6.8 Hz, 1H), 7.48-7.25 (m, 6H), 6.54 (d, *J* = 16.8 Hz, 1H), 4.62 (s, 2H), 2.42 (s, 3H); TLC *R*<sub>f</sub> (CH<sub>2</sub>Cl<sub>2</sub>: MeOH 9:1) = 0.45.

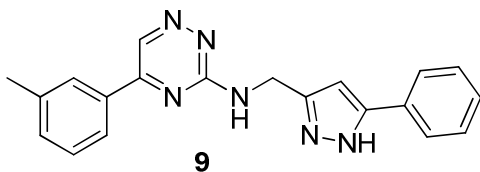

***N*-((5-Phenyl-1*H*-pyrazol-3-yl)methyl)-5-*m*-tolyl-1,2,4-triazin-3-amine (9)**

<sup>1</sup>H NMR (400 MHz, DMSO-*d*<sub>6</sub>) δ 13.05 (s, 0.5H), 12.82 (s, 0.5H), 9.27 (s, 1H), 8.04 (s, 1H), 8.01 (d, *J* = 7.2 Hz, 1H), 7.72 (m, 2H), 7.47-7.38 (m, 5H), 7.28 (m, 1H), 6.62 (s, 1H), 4.68 (s, 2H), 2.35 (s, 3H); TLC *R*<sub>f</sub> (CH<sub>2</sub>Cl<sub>2</sub>:MeOH 20:1) = 0.22.

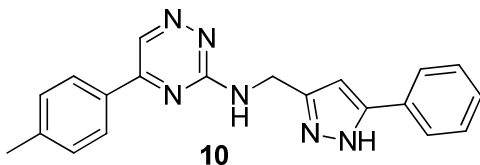

***N*-((5-Phenyl-1*H*-pyrazol-3-yl)methyl)-5-*p*-tolyl-1,2,4-triazin-3-amine (10)**

<sup>1</sup>H NMR (400 MHz, DMSO-*d*<sub>6</sub>) δ 13.01 (s, 1H), 9.22 (d, *J* = 13.6 Hz, 1H), 8.09 (d, *J* = 8.0 Hz, 2H), 7.67 (d, *J* = 19.6 Hz, 2H), 7.36-7.21 (m, 4H), 6.56 (s, 1H), 4.62 (d, *J* = 21.2 Hz, 2H), 2.35 (s, 3H); LRMS (electrospray) *m/z* calculated for C<sub>20</sub>H<sub>19</sub>N<sub>6</sub> [M+H]<sup>+</sup> 343.17, found 343.16.

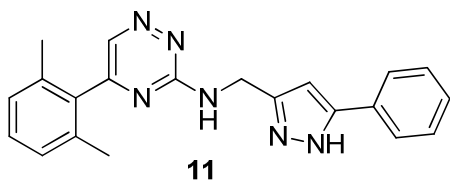

**5-(2,6-Dimethylphenyl)-N-((5-phenyl-1H-pyrazol-3-yl)methyl)-1,2,4-triazin-3-amine (11)**

<sup>1</sup>H NMR (400 MHz, DMSO-*d*<sub>6</sub>) δ 12.92 (s, 1H), 8.60 (s, 1H), 7.69 (d, *J* = 7.2 Hz, 2H), 7.39 (t, *J* = 7.6 Hz, 2H), 7.30-7.23 (m, 2H), 7.13 (d, *J* = 7.6 Hz, 2H), 6.54 (s, 1H), 4.60 (s, 2H), 2.01 (s, 6H); TLC *R<sub>f</sub>* (CH<sub>2</sub>Cl<sub>2</sub>:MeOH 20:1) = 0.24.

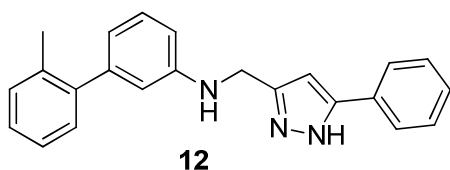

**2'-Methyl-N-((5-phenyl-1H-pyrazol-3-yl)methyl)biphenyl-3-amine (12)**

<sup>1</sup>H NMR (400 MHz, CD<sub>3</sub>OD) δ 7.66 (d, *J* = 7.6 Hz, 2H), 7.36 (t, *J* = 7.4 Hz, 2H), 7.28 (t, *J* = 7.2 Hz, 1H), 7.16-7.11 (m, 5H), 6.67 (d, *J* = 8.0 Hz, 1H), 6.59-6.53 (m, 3H), 4.36 (s, 2H), 2.14 (s, 3H); TLC *R<sub>f</sub>* (*n*-Hexanes: EtOAc 2:1) = 0.34; LRMS (electrospray) *m/z* calculated for C<sub>23</sub>H<sub>22</sub>N<sub>3</sub> [M+H]<sup>+</sup> 340.18, found 340.17.

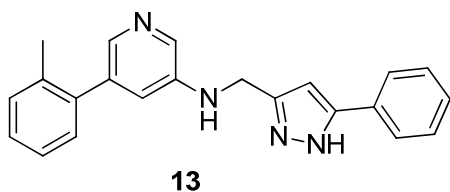

<sup>1</sup>H NMR (400 MHz, CD<sub>3</sub>OD) δ 7.99 (d, *J* = 2.4 Hz, 1H), 7.70 (m, 3H), 7.40 (t, *J* = 7.2 Hz, 2H), 7.32 (d, *J* = 7.2 Hz, 1H), 7.24-7.19 (m, 3H), 7.14 (d, *J* = 7.2 Hz, 1H), 6.99 (s, 1H), 6.60 (s, 1H), 4.42 (s, 2H), 2.15 (s, 3H); TLC *R<sub>f</sub>* (CH<sub>2</sub>Cl<sub>2</sub>:MeOH 20:1) = 0.28.

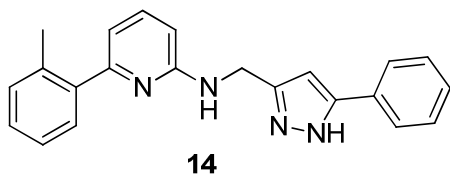

**N-((5-Phenyl-1H-pyrazol-3-yl)methyl)-6-o-tolylpyridin-2-amine (14)**

<sup>1</sup>H NMR (400 MHz, CDCl<sub>3</sub>) δ 7.65 (d, *J* = 8.0 Hz, 2H), 7.49-7.42 (m, 2H), 7.37-7.34 (m, 2H), 7.29-7.24 (m, 4H), 6.74 (d, *J* = 7.2 Hz, 1H), 6.45 (s, 1H), 6.40 (d, *J* = 8.4, 1H), 4.56 (d, *J* = 5.2, 2H), 2.40 (s, 3H); TLC *R<sub>f</sub>* (*n*-Hexanes:EtOAc 2:1) = 0.22.

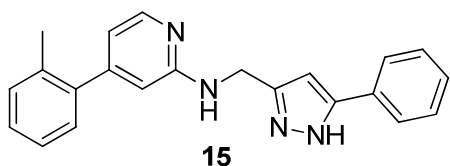

***N*-((5-Phenyl-1*H*-pyrazol-3-yl)methyl)-4-*o*-tolylpyridin-2-amine (15)**

<sup>1</sup>H NMR (400 MHz, CD<sub>3</sub>OD) δ 7.99 (d, *J* = 4.0 Hz, 1H), 7.70-7.67 (m, 2H), 7.37-7.35 (m, 2H), 7.30-7.29 (m, 1H), 7.23-7.13 (m, 4H), 6.58 (s, 1H), 6.54 (d, *J* = 5.2 Hz, 1H), 6.50 (s, 1H), 4.55 (s, 2H), 2.20 (s, 3H); TLC *R<sub>f</sub>* (*n*-Hexanes:EtOAc 1:2) = 0.21.

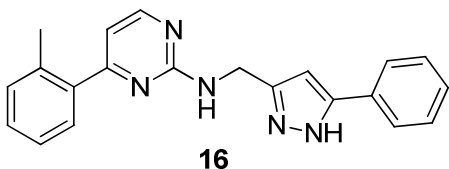

***N*-((5-Phenyl-1*H*-pyrazol-3-yl)methyl)-4-*o*-tolylpyrimidin-2-amine (16)**

<sup>1</sup>H NMR (400 MHz, CDCl<sub>3</sub>) δ 8.73 (d, *J* = 5.2 Hz, 1H), 7.80 (d, *J* = 6.8 Hz, 2H), 7.42-7.22 (m, 7H), 7.16 (d, *J* = 5.2 Hz, 1H), 6.63 (s, 1H), 5.51 (s, 2H), 2.34 (s, 3H); TLC *R<sub>f</sub>* (*n*-Hexanes:EtOAc 1:2) = 0.19.

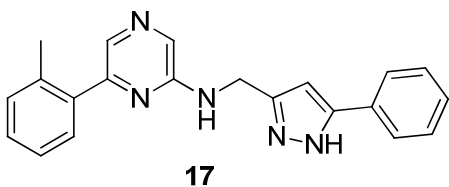

***N*-((5-Phenyl-1*H*-pyrazol-3-yl)methyl)-6-*o*-tolylpyrazin-2-amine (17)**

<sup>1</sup>H NMR (400 MHz, CD<sub>3</sub>OD) δ 7.93 (s, 1H), 7.73 (s, 1H), 7.66 (d, *J* = 7.6 Hz, 2H), 7.40-7.27 (m, 7H), 6.59 (s, 1H), 4.53 (s, 2H), 2.30 (s, 3H); TLC *R<sub>f</sub>* (*n*-Hexanes:EtOAc 1:2) = 0.24.

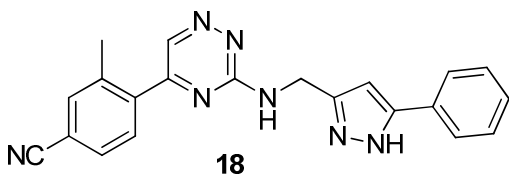

**3-Methyl-4-(3-((5-phenyl-1*H*-pyrazol-3-yl)methylamino)-1,2,4-triazin-5-yl)benzonitrile (18)**

<sup>1</sup>H NMR (400 MHz, CDCl<sub>3</sub>) δ 8.72 (s, 1H), 7.61 (d, *J* = 7.2 Hz, 2H), 7.57-7.52 (m, 3H), 7.38-7.28 (m, 3H), 6.52 (s, 1H), 4.81 (s, 2H), 2.45 (s, 3H); TLC *R<sub>f</sub>* (CH<sub>2</sub>Cl<sub>2</sub>:MeOH 10:1) = 0.33; LRMS (electrospray) *m/z* calculated for C<sub>21</sub>H<sub>17</sub>N<sub>7</sub> [M+H]<sup>+</sup> 367.41, found 367.94.

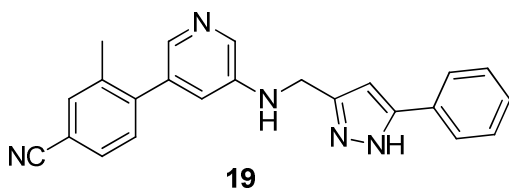

**3-Methyl-4-(5-((5-phenyl-1*H*-pyrazol-3-yl)methylamino)pyridin-3-yl)benzonitrile (19)**

<sup>1</sup>H NMR (400 MHz, CD<sub>3</sub>OD) δ 8.04 (s, 1H), 7.71-7.63 (m, 5H), 7.58 (d, *J* = 7.2 Hz, 1H), 7.41-7.29 (m, 5H), 7.00 (t, *J* = 2.2 Hz, 1H), 6.60 (s, 1H), 4.42 (s, 2H), 2.19 (s, 3H); TLC *R<sub>f</sub>* (CH<sub>2</sub>Cl<sub>2</sub>:MeOH 20:1) = 0.20.

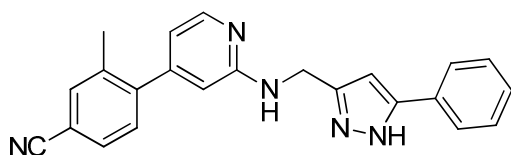

**20**

**3-Methyl-4-(2-((5-phenyl-1H-pyrazol-3-yl)methylamino)pyridin-4-yl)benzonitrile (20)**

<sup>1</sup>H NMR (400 MHz, CDCl<sub>3</sub>) δ 8.21 (d, *J* = 5.2 Hz, 1H), 7.70 (d, *J* = 7.6 Hz, 2H), 7.54 (s, 1H), 7.51 (d, *J* = 8.0 Hz, 1H), 7.40 (t, *J* = 7.4 Hz, 2H), 7.33 (d, *J* = 7.2 Hz, 1H), 7.25 (d, *J* = 9.2 Hz, 1H), 6.55 (dd, *J* = 6.4, 2.4 Hz, 1H), 6.51 (s, 1H), 6.35 (s, 1H), 4.62 (d, *J* = 4.8 Hz, 2H), 2.26 (s, 3H); TLC *R<sub>f</sub>*(CH<sub>2</sub>Cl<sub>2</sub>:MeOH 20:1) = 0.28.

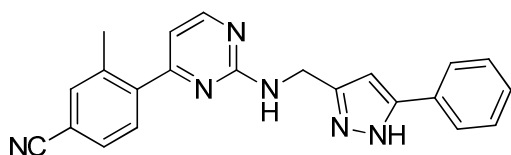

**21**

**3-Methyl-4-(2-((5-phenyl-1H-pyrazol-3-yl)methylamino)pyrimidin-4-yl)benzonitrile (21)**

<sup>1</sup>H NMR (400 MHz, CDCl<sub>3</sub>) δ 8.45 (d, *J* = 4.8 Hz, 1H), 7.63 (d, *J* = 7.6 Hz, 2H), 7.55 (d, *J* = 4.8 Hz, 2H), 7.50 (d, *J* = 8.4 Hz, 1H), 7.39 (t, *J* = 7.8 Hz, 1H), 7.33 (d, *J* = 8.0 Hz, 1H), 6.71 (d, *J* = 7.8 Hz, 1H), 6.50 (s, 1H), 4.70 (d, *J* = 6.4 Hz, 2H), 2.43 (s, 3H); TLC *R<sub>f</sub>*(*n*-Hexanes:EtOAc 1:1 with 0.5% MeOH) = 0.10.

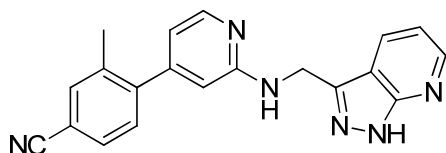

**22**

**4-(2-((1H-Pyrazolo[3,4-*b*]pyridin-3-yl)methylamino)pyridin-4-yl)-3-methylbenzonitrile (22)**

<sup>1</sup>H NMR (400 MHz, DMSO-*d*<sub>6</sub>) δ 13.36 (s, 1H), 8.46 (dd, *J* = 4.8, 1.6 Hz, 1H), 8.25 (dd, *J* = 8.0, 1.6 Hz, 1H), 8.07 (dd, *J* = 4.8, 1.2 Hz, 1H), 7.78 (s, 1H), 7.70 (dd, *J* = 8.0, 1.2 Hz, 1H), 7.34 (d, *J* = 8.0 Hz, 1H), 7.22 (m, 1H), 7.12 (dd, *J* = 8.0, 4.4 Hz, 1H), 6.49 (d, *J* = 1.6 Hz, 1H), 6.48 (s, 1H), 4.80 (s, 2H), 2.20 (s, 3H); TLC *R<sub>f</sub>*(CH<sub>2</sub>Cl<sub>2</sub>:MeOH 19:1) = 0.16.

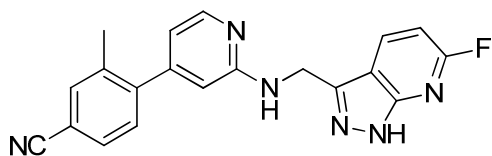

**23**

**4-(2-((6-Fluoro-1H-pyrazolo[3,4-*b*]pyridin-3-yl)methylamino)pyridin-4-yl)-3-methylbenzonitrile (23)**

<sup>1</sup>H NMR (400 MHz, CDCl<sub>3</sub> with 20% CD<sub>3</sub>OD) δ 8.16 (t, *J* = 8.0 Hz, 1H), 7.98 (d, *J* = 4.8 Hz, 1H), 7.41 (s, 1H), 7.38 (d, *J* = 8.0 Hz, 1H), 7.12 (d, *J* = 7.6 Hz, 1H), 6.63 (d, *J* = 8.4 Hz, 1H), 6.40-6.39 (m, 1H), 6.30 (s, 1H), 4.72 (s, 2H), 2.04 (s, 3H); TLC *R<sub>f</sub>*(CH<sub>2</sub>Cl<sub>2</sub>:MeOH 20:1) = 0.47; LRMS (electrospray) *m/z* calculated for C<sub>20</sub>H<sub>15</sub>FN<sub>6</sub> [M+H]<sup>+</sup> 358.37, found 359.01.

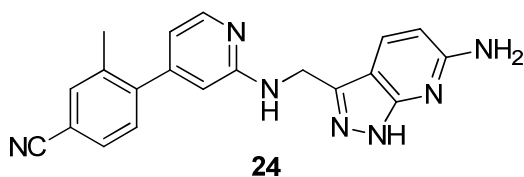

**4-(2-((6-Amino-1H-pyrazolo[3,4-b]pyridin-3-yl)methylamino)pyridin-4-yl)-3-methylbenzonitrile (24)**

<sup>1</sup>H NMR (400 MHz, DMSO-*d*<sub>6</sub>) δ 8.06 (d, *J* = 6.0 Hz, 1H), 7.77 (s, 1H), 7.70 (d, *J* = 8.4 Hz, 2H), 7.33 (d, *J* = 8.0 Hz, 1H), 7.05 (t, *J* = 6.0 Hz, 1H), 6.47-6.46 (m, 2H), 6.23 (d, *J* = 8.8 Hz, 1H), 6.19 (s, 1H), 4.60 (d, *J* = 5.6 Hz, 2H), 2.20 (s, 3H); TLC *R*<sub>f</sub> (CH<sub>2</sub>Cl<sub>2</sub>:MeOH 20:1) = 0.38; LRMS (electrospray) *m/z* calculated for C<sub>20</sub>H<sub>17</sub>N<sub>7</sub> [M+H]<sup>+</sup> 355.40, found 355.88.

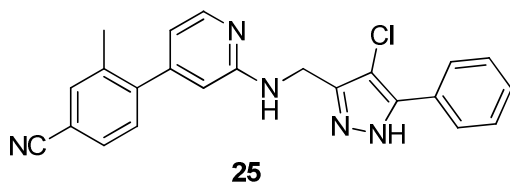

**4-(2-((4-Chloro-5-phenyl-1H-pyrazol-3-yl)methylamino)pyridin-4-yl)-3-methylbenzonitrile (25)**

<sup>1</sup>H NMR (400 MHz, CDCl<sub>3</sub>) δ 11.70 (bs, 1H), 8.16 (d, *J* = 5.2 Hz, 1H), 7.83 (d, *J* = 6.8 Hz, 2H), 7.56 (s, 1H), 7.54 (d, *J* = 8.0 Hz, 1H), 7.47 (t, *J* = 7.6 Hz, 2H), 7.41 (d, *J* = 7.6 Hz, 1H), 7.28 (d, *J* = 7.6 Hz, 1H), 6.57 (dd, *J* = 5.2, 1.2 Hz, 1H), 6.43 (s, 1H), 5.60 (bs, 1H), 4.59 (d, *J* = 5.6 Hz, 2H), 2.29 (s, 3H); LRMS (electrospray) *m/z* calculated for C<sub>23</sub>H<sub>19</sub>ClN<sub>5</sub> [M+H]<sup>+</sup> 400.13, found 400.30.

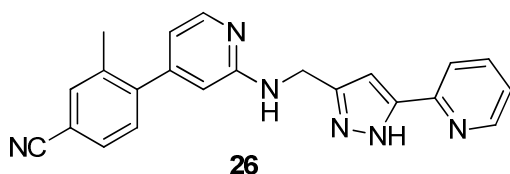

**3-Methyl-4-(2-((5-(pyridin-2-yl)-1H-pyrazol-3-yl)methylamino)pyridin-4-yl)benzonitrile (26)**

<sup>1</sup>H NMR (400 MHz, CDCl<sub>3</sub> with 20% CD<sub>3</sub>OD) δ 8.49 (d, *J* = 4.8 Hz, 2H), 8.04 (d, *J* = 5.6 Hz, 2H), 7.73-7.70 (m, 1H), 7.49-7.31 (m, 2H), 7.22-7.19 (m, 2H), 6.72 (s, 1H), 6.47 (d, *J* = 5.6 Hz, 1H), 4.53 (s, 2H), 2.20 (s, 3H); TLC *R*<sub>f</sub> (CH<sub>2</sub>Cl<sub>2</sub>:MeOH 20:1) = 0.56.
